# Supplementary material for: Bird diversity along an urban to rural gradient in large tropical cities peaks in mid-level urbanization
Source: PeerJ. 2023 Oct 9;11:e16098. doi: 10.7717/peerj.16098 (PMC10569181; doi:10.7717/peerj.16098)
Supplement: Table S1 [file peerj-11-16098-s001.xlsx]

## Sheet: Tabelle1
Point_ID	City	Habitat	Day	Month	Year	hours	minutes	English Name	Count
MAWDT05	Mawlamyine	Downtown City	12	3	2019	7	13	Asian Koel	1
MAWDT01	Mawlamyine	Downtown City	12	3	2019	8	17	Asian Palm Swift	21
MAWDT02	Mawlamyine	Downtown City	12	3	2019	8	2	Asian Palm Swift	6
MAWDT03	Mawlamyine	Downtown City	12	3	2019	7	51	Asian Palm Swift	2
MAWDT04	Mawlamyine	Downtown City	12	3	2019	7	37	Asian Palm Swift	1
MAWDT05	Mawlamyine	Downtown City	12	3	2019	7	13	Asian Palm Swift	13
MAWDT07	Mawlamyine	Downtown City	12	3	2019	6	46	Asian Palm Swift	6
MAWDT08	Mawlamyine	Downtown City	12	3	2019	6	31	Asian Palm Swift	1
MAWDT09	Mawlamyine	Downtown City	12	3	2019	6	4	Asian Palm Swift	2
MDLDT01	Mandalay	Downtown City	26	7	2019	5	49	Ayeyarwaddy Bulbul	3
MDLDT01	Mandalay	Downtown City	26	7	2019	5	50	Eurasian Tree Sparrow	10
MDLDT01	Mandalay	Downtown City	26	7	2019	5	49	Himalayan Swiftlet	24
MDLDT01	Mandalay	Downtown City	26	7	2019	5	50	House Crow	4
MDLDT01	Mandalay	Downtown City	26	7	2019	5	47	House Sparrow	25
MDLDT01	Mandalay	Downtown City	26	7	2019	5	48	Rock Pigeon	48
MDLDT02	Mandalay	Downtown City	26	7	2019	5	42	Ayeyarwaddy Bulbul	3
MGZDT01	Myeik	Downtown City	6	3	2019	6	28	Barn Swallow	3
MDLDT02	Mandalay	Downtown City	26	7	2019	5	32	Himalayan Swiftlet	58
MDLDT02	Mandalay	Downtown City	26	7	2019	5	34	House Sparrow	3
MDLDT02	Mandalay	Downtown City	26	7	2019	5	32	Rock Pigeon	63
MGZDT03	Myeik	Downtown City	6	3	2019	6	51	Brahminy Kite	1
MGZDT04	Myeik	Downtown City	6	3	2019	7	9	Brahminy Kite	1
MGZDT05	Myeik	Downtown City	6	3	2019	7	35	Brahminy Kite	2
MGZDT06	Myeik	Downtown City	6	3	2019	8	7	Brahminy Kite	1
MGZDT08	Myeik	Downtown City	6	3	2019	8	20	Brahminy Kite	1
MDLDT03	Mandalay	Downtown City	26	7	2019	8	7	House Crow	3
MAWDT01	Mawlamyine	Downtown City	12	3	2019	8	26	Common Myna	2
MAWDT04	Mawlamyine	Downtown City	12	3	2019	7	31	Common Myna	2
MAWDT05	Mawlamyine	Downtown City	12	3	2019	7	13	Common Myna	6
MAWDT07	Mawlamyine	Downtown City	12	3	2019	6	46	Common Myna	3
MAWDT08	Mawlamyine	Downtown City	12	3	2019	6	23	Common Myna	11
MAWDT09	Mawlamyine	Downtown City	12	3	2019	6	3	Common Myna	13
MAWDT10	Mawlamyine	Downtown City	12	3	2019	5	47	Common Myna	1
MDLDT03	Mandalay	Downtown City	26	7	2019	8	8	House Sparrow	20
MDLDT03	Mandalay	Downtown City	26	7	2019	8	7	Little Egret	1
MDLDT03	Mandalay	Downtown City	26	7	2019	8	6	Rock Pigeon	325
MGZDT01	Myeik	Downtown City	6	3	2019	6	38	Common Myna	4
MGZDT02	Myeik	Downtown City	6	3	2019	6	14	Common Myna	5
MGZDT04	Myeik	Downtown City	6	3	2019	7	9	Common Myna	2
MGZDT05	Myeik	Downtown City	6	3	2019	7	25	Common Myna	4
MGZDT06	Myeik	Downtown City	6	3	2019	7	57	Common Myna	3
MGZDT07	Myeik	Downtown City	6	3	2019	7	43	Common Myna	3
MGZDT08	Myeik	Downtown City	6	3	2019	8	20	Common Myna	3
MGZDT09	Myeik	Downtown City	6	3	2019	8	35	Common Myna	1
MGZDT10	Myeik	Downtown City	6	3	2019	6	6	Common Myna	6
MDLDT03	Mandalay	Downtown City	26	7	2019	8	16	Spotted Dove	1
MDLDT04	Mandalay	Downtown City	26	7	2019	6	27	Ayeyarwaddy Bulbul	3
MGZDT01	Myeik	Downtown City	6	3	2019	6	28	Common Tailorbird	1
MGZDT03	Myeik	Downtown City	6	3	2019	6	41	Common Tailorbird	1
MAWDT01	Mawlamyine	Downtown City	12	3	2019	8	23	Coppersmith Barbet	2
MAWDT09	Mawlamyine	Downtown City	12	3	2019	6	10	Coppersmith Barbet	1
MDLDT04	Mandalay	Downtown City	26	7	2019	6	25	Common Tailorbird	1
MGZDT01	Myeik	Downtown City	6	3	2019	6	28	Edible-nest Swiftlet	5
MGZDT02	Myeik	Downtown City	6	3	2019	6	24	Edible-nest Swiftlet	16
MGZDT03	Myeik	Downtown City	6	3	2019	6	41	Edible-nest Swiftlet	7
MGZDT04	Myeik	Downtown City	6	3	2019	7	19	Edible-nest Swiftlet	1
MGZDT05	Myeik	Downtown City	6	3	2019	7	25	Edible-nest Swiftlet	6
MGZDT06	Myeik	Downtown City	6	3	2019	7	57	Edible-nest Swiftlet	4
MGZDT08	Myeik	Downtown City	6	3	2019	8	20	Edible-nest Swiftlet	1
MGZDT09	Myeik	Downtown City	6	3	2019	8	35	Edible-nest Swiftlet	3
MGZDT10	Myeik	Downtown City	6	3	2019	5	56	Edible-nest Swiftlet	25
MAWDT01	Mawlamyine	Downtown City	12	3	2019	8	17	Eurasian Tree Sparrow	11
MAWDT02	Mawlamyine	Downtown City	12	3	2019	8	2	Eurasian Tree Sparrow	13
MAWDT03	Mawlamyine	Downtown City	12	3	2019	7	47	Eurasian Tree Sparrow	6
MAWDT04	Mawlamyine	Downtown City	12	3	2019	7	30	Eurasian Tree Sparrow	11
MAWDT05	Mawlamyine	Downtown City	12	3	2019	7	13	Eurasian Tree Sparrow	8
MAWDT06	Mawlamyine	Downtown City	12	3	2019	6	55	Eurasian Tree Sparrow	5
MAWDT07	Mawlamyine	Downtown City	12	3	2019	6	40	Eurasian Tree Sparrow	7
MAWDT08	Mawlamyine	Downtown City	12	3	2019	6	26	Eurasian Tree Sparrow	10
MAWDT10	Mawlamyine	Downtown City	12	3	2019	5	48	Eurasian Tree Sparrow	3
MDLDT04	Mandalay	Downtown City	26	7	2019	6	27	Eurasian Tree sparrow	5
MDLDT04	Mandalay	Downtown City	26	7	2019	6	29	Himalayan Swiftlet	2
MDLDT04	Mandalay	Downtown City	26	7	2019	6	27	House Crow	6
MGZDT02	Myeik	Downtown City	6	3	2019	6	14	Eurasian Tree Sparrow	6
MGZDT03	Myeik	Downtown City	6	3	2019	6	41	Eurasian Tree Sparrow	7
MGZDT04	Myeik	Downtown City	6	3	2019	7	9	Eurasian Tree Sparrow	6
MGZDT05	Myeik	Downtown City	6	3	2019	7	25	Eurasian Tree Sparrow	15
MGZDT06	Myeik	Downtown City	6	3	2019	7	57	Eurasian Tree Sparrow	6
MGZDT07	Myeik	Downtown City	6	3	2019	7	53	Eurasian Tree Sparrow	8
MGZDT08	Myeik	Downtown City	6	3	2019	8	20	Eurasian Tree Sparrow	6
MGZDT09	Myeik	Downtown City	6	3	2019	8	35	Eurasian Tree Sparrow	6
MGZDT10	Myeik	Downtown City	6	3	2019	5	56	Eurasian Tree Sparrow	20
MDLDT04	Mandalay	Downtown City	26	7	2019	6	25	House Sparrow	8
MDLDT04	Mandalay	Downtown City	26	7	2019	6	30	Little Green Bee-eater	1
MDLDT04	Mandalay	Downtown City	26	7	2019	6	30	Purple Sunbird	1
MDLDT04	Mandalay	Downtown City	26	7	2019	6	24	Rock Pigeon	82
MDLDT05	Mandalay	Downtown City	26	7	2019	6	41	Ayeyarwaddy Bulbul	2
MDLDT05	Mandalay	Downtown City	26	7	2019	6	50	Blue-tailed Bee-eater	1
MDLDT05	Mandalay	Downtown City	26	7	2019	6	42	Coppersmith Barbet	4
MDLDT05	Mandalay	Downtown City	26	7	2019	6	45	Himalayan Swiftlet	1
MDLDT05	Mandalay	Downtown City	26	7	2019	6	41	House Crow	8
MAWDT01	Mawlamyine	Downtown City	12	3	2019	8	17	House Crow	24
MAWDT02	Mawlamyine	Downtown City	12	3	2019	8	2	House Crow	7
MAWDT03	Mawlamyine	Downtown City	12	3	2019	7	47	House Crow	11
MAWDT04	Mawlamyine	Downtown City	12	3	2019	7	30	House Crow	11
MAWDT05	Mawlamyine	Downtown City	12	3	2019	7	13	House Crow	11
MAWDT06	Mawlamyine	Downtown City	12	3	2019	6	55	House Crow	9
MAWDT07	Mawlamyine	Downtown City	12	3	2019	6	39	House Crow	18
MAWDT08	Mawlamyine	Downtown City	12	3	2019	6	25	House Crow	25
MAWDT09	Mawlamyine	Downtown City	12	3	2019	6	3	House Crow	45
MAWDT10	Mawlamyine	Downtown City	12	3	2019	5	47	House Crow	10
MAWDT10	Mawlamyine	Downtown City	12	3	2019	5	54	House Crow	1
MDLDT05	Mandalay	Downtown City	26	7	2019	6	41	House Sparrow	9
MDLDT05	Mandalay	Downtown City	26	7	2019	6	40	Rock Pigeon	320
MDLDT06	Mandalay	Downtown City	26	7	2019	6	58	Asian Palm Swift	2
MDLDT06	Mandalay	Downtown City	26	7	2019	6	57	Ayeyarwaddy Bulbul	3
MDLDT06	Mandalay	Downtown City	26	7	2019	6	59	Blue-tailed Bee-eater	4
MDLDT06	Mandalay	Downtown City	26	7	2019	6	56	Himalayan Swiftlet	3
MDLDT06	Mandalay	Downtown City	26	7	2019	6	56	House Crow	7
MDLDT06	Mandalay	Downtown City	26	7	2019	6	59	House Sparrow	3
MGZDT01	Myeik	Downtown City	6	3	2019	6	28	House Crow	10
MGZDT02	Myeik	Downtown City	6	3	2019	6	14	House Crow	2
MGZDT03	Myeik	Downtown City	6	3	2019	6	41	House Crow	13
MGZDT04	Myeik	Downtown City	6	3	2019	7	9	House Crow	4
MGZDT05	Myeik	Downtown City	6	3	2019	7	25	House Crow	15
MGZDT06	Myeik	Downtown City	6	3	2019	7	57	House Crow	13
MGZDT07	Myeik	Downtown City	6	3	2019	7	43	House Crow	13
MGZDT08	Myeik	Downtown City	6	3	2019	8	20	House Crow	7
MGZDT09	Myeik	Downtown City	6	3	2019	8	35	House Crow	9
MGZDT10	Myeik	Downtown City	6	3	2019	5	56	House Crow	8
MAWDT02	Mawlamyine	Downtown City	12	3	2019	8	3	House Sparrow	6
MAWDT03	Mawlamyine	Downtown City	12	3	2019	7	48	House Sparrow	4
MDLDT06	Mandalay	Downtown City	26	7	2019	6	56	Rock Pigeon	120
MDLDT06	Mandalay	Downtown City	26	7	2019	6	58	Venous-breasted Myna	4
MDLDT07	Mandalay	Downtown City	26	7	2019	7	17	Common Myna	5
MDLDT07	Mandalay	Downtown City	26	7	2019	7	14	Himalayan Swiftlet	10
MDLDT07	Mandalay	Downtown City	26	7	2019	7	13	House Crow	3
MDLDT07	Mandalay	Downtown City	26	7	2019	7	18	House Sparrow	3
MDLDT07	Mandalay	Downtown City	26	7	2019	7	13	Jungle Myna	12
MDLDT07	Mandalay	Downtown City	26	7	2019	7	12	Rock Pigeon	21
MDLDT07	Mandalay	Downtown City	26	7	2019	7	19	Spotted Dove	1
MDLDT08	Mandalay	Downtown City	26	7	2019	7	30	Ayeyarwaddy Bulbul	5
MDLDT08	Mandalay	Downtown City	26	7	2019	7	31	Blue-tailed Bee-eater	5
MAWDT09	Mawlamyine	Downtown City	12	3	2019	6	11	Large-billed Crow	1
MGZDT10	Myeik	Downtown City	6	3	2019	8	45	Large-billed Crow	3
MDLDT08	Mandalay	Downtown City	26	7	2019	7	37	Common Myna	2
MDLDT08	Mandalay	Downtown City	26	7	2019	7	28	Common Tailorbird	3
MDLDT08	Mandalay	Downtown City	26	7	2019	7	38	Eurasian Tree Sparrow	2
MDLDT08	Mandalay	Downtown City	26	7	2019	7	33	Himalayan Swiftlet	3
MGZDT06	Myeik	Downtown City	6	3	2019	7	57	Olive-backed Sunbird	1
MAWDT06	Mawlamyine	Downtown City	12	3	2019	6	58	Oriental Magpie Robin	1
MAWDT10	Mawlamyine	Downtown City	12	3	2019	5	47	Oriental Magpie Robin	1
MDLDT08	Mandalay	Downtown City	26	7	2019	7	28	House Sparrow	10
MDLDT08	Mandalay	Downtown City	26	7	2019	7	28	Rock Pigeon	67
MAWDT02	Mawlamyine	Downtown City	12	3	2019	8	3	Red-vented Bulbul	1
MAWDT04	Mawlamyine	Downtown City	12	3	2019	7	38	Red-vented Bulbul	3
MAWDT06	Mawlamyine	Downtown City	12	3	2019	6	59	Red-vented Bulbul	2
MAWDT08	Mawlamyine	Downtown City	12	3	2019	6	23	Red-vented Bulbul	4
MAWDT10	Mawlamyine	Downtown City	12	3	2019	5	49	Red-vented Bulbul	1
MAWDT07	Mawlamyine	Downtown City	12	3	2019	6	39	Red-whiskered Bulbul	1
MAWDT01	Mawlamyine	Downtown City	12	3	2019	8	17	Rock Pigeon	45
MAWDT02	Mawlamyine	Downtown City	12	3	2019	8	1	Rock Pigeon	22
MAWDT03	Mawlamyine	Downtown City	12	3	2019	7	47	Rock Pigeon	55
MAWDT04	Mawlamyine	Downtown City	12	3	2019	7	30	Rock Pigeon	18
MAWDT06	Mawlamyine	Downtown City	12	3	2019	6	56	Rock Pigeon	4
MAWDT07	Mawlamyine	Downtown City	12	3	2019	6	39	Rock Pigeon	25
MAWDT08	Mawlamyine	Downtown City	12	3	2019	6	23	Rock Pigeon	78
MAWDT10	Mawlamyine	Downtown City	12	3	2019	5	52	Rock Pigeon	1
MDLDT08	Mandalay	Downtown City	26	7	2019	7	30	Scaly-breasted Munia	9
MDLDT09	Mandalay	Downtown City	26	7	2019	7	55	Common Hoopoe	1
MDLDT09	Mandalay	Downtown City	26	7	2019	7	52	Common Myna	3
MDLDT09	Mandalay	Downtown City	26	7	2019	7	53	Himalayan Swiftlet	1
MDLDT09	Mandalay	Downtown City	26	7	2019	7	46	House Crow	4
MDLDT09	Mandalay	Downtown City	26	7	2019	7	51	Jungle Myna	7
MDLDT09	Mandalay	Downtown City	26	7	2019	7	47	Little Cormorant	1
MDLDT09	Mandalay	Downtown City	26	7	2019	7	54	Little Egret	1
MDLDT09	Mandalay	Downtown City	26	7	2019	7	48	Purple Sunbird	1
MDLDT09	Mandalay	Downtown City	26	7	2019	7	47	Rock Pigeon	25
MGZDT01	Myeik	Downtown City	6	3	2019	6	28	Rock Pigeon	6
MGZDT02	Myeik	Downtown City	6	3	2019	6	14	Rock Pigeon	69
MGZDT03	Myeik	Downtown City	6	3	2019	6	41	Rock Pigeon	7
MGZDT04	Myeik	Downtown City	6	3	2019	7	9	Rock Pigeon	100
MGZDT05	Myeik	Downtown City	6	3	2019	7	25	Rock Pigeon	75
MGZDT06	Myeik	Downtown City	6	3	2019	7	57	Rock Pigeon	100
MGZDT07	Myeik	Downtown City	6	3	2019	7	43	Rock Pigeon	11
MGZDT08	Myeik	Downtown City	6	3	2019	8	20	Rock Pigeon	5
MGZDT09	Myeik	Downtown City	6	3	2019	8	35	Rock Pigeon	2
MGZDT10	Myeik	Downtown City	6	3	2019	5	56	Rock Pigeon	18
MDLDT09	Mandalay	Downtown City	26	7	2019	7	46	Venous-breasted Myna	1
MGZDT06	Myeik	Downtown City	6	3	2019	7	57	Scaly-breasted Munia	1
MAWDT06	Mawlamyine	Downtown City	12	3	2019	7	1	Scarlet-backed Flowerpecker	1
MDLDT10	Mandalay	Downtown City	26	7	2019	6	8	Himalayan Swiftlet	9
MDLDT10	Mandalay	Downtown City	26	7	2019	6	8	House Crow	4
MGZDT08	Myeik	Downtown City	6	3	2019	8	30	Spotted Dove	1
MDLDT10	Mandalay	Downtown City	26	7	2019	6	10	House Sparrow	3
MDLDT10	Mandalay	Downtown City	26	7	2019	6	7	Rock Pigeon	97
MDLDT10	Mandalay	Downtown City	26	7	2019	6	15	White-throated Babbler	1
MDLMH06	Mandalay	M Hill	24	7	2019	6	54	Ashy Wood Swallow	5
MDLMH05	Mandalay	M Hill	24	7	2019	7	16	Asian Koel	1
MDLMH01	Mandalay	M Hill	24	7	2019	8	48	Ayeyarwaddy Bulbul	2
MDLMH02	Mandalay	M Hill	24	7	2019	8	31	Ayeyarwaddy Bulbul	5
MDLMH03	Mandalay	M Hill	24	7	2019	7	29	Ayeyarwaddy Bulbul	6
MDLMH04	Mandalay	M Hill	24	7	2019	7	56	Ayeyarwaddy Bulbul	4
MDLMH05	Mandalay	M Hill	24	7	2019	7	14	Ayeyarwaddy Bulbul	3
MDLMH06	Mandalay	M Hill	24	7	2019	6	55	Ayeyarwaddy Bulbul	1
MDLMH07	Mandalay	M Hill	24	7	2019	6	29	Ayeyarwaddy Bulbul	3
MDLMH09	Mandalay	M Hill	24	7	2019	5	51	Ayeyarwaddy Bulbul	7
MDLMH10	Mandalay	M Hill	24	7	2019	5	31	Ayeyarwaddy Bulbul	3
MDLMH01	Mandalay	M Hill	24	7	2019	8	52	Barn Swallow	1
MDLMH05	Mandalay	M Hill	24	7	2019	7	21	Black Drongo	1
MDLMH07	Mandalay	M Hill	24	7	2019	6	39	Blue-tailed Bee-eater	1
MDLMH02	Mandalay	M Hill	24	7	2019	8	36	Common Iora	1
MDLMH03	Mandalay	M Hill	24	7	2019	7	35	Common Iora	1
MDLMH08	Mandalay	M Hill	24	7	2019	6	19	Common Iora	2
MDLMH09	Mandalay	M Hill	24	7	2019	5	53	Common Iora	2
MDLMH10	Mandalay	M Hill	24	7	2019	5	34	Common Iora	1
MDLMH01	Mandalay	M Hill	24	7	2019	8	56	Common Myna	2
MDLMH01	Mandalay	M Hill	24	7	2019	8	54	Common Tailorbird	1
MDLMH02	Mandalay	M Hill	24	7	2019	8	40	Common Tailorbird	1
MDLMH05	Mandalay	M Hill	24	7	2019	7	13	Common Tailorbird	2
MDLMH06	Mandalay	M Hill	24	7	2019	6	59	Common Tailorbird	1
MDLMH07	Mandalay	M Hill	24	7	2019	6	35	Common Tailorbird	1
MDLMH08	Mandalay	M Hill	24	7	2019	6	15	Common Tailorbird	2
MDLMH09	Mandalay	M Hill	24	7	2019	5	51	Common Tailorbird	3
MDLMH10	Mandalay	M Hill	24	7	2019	5	36	Common Tailorbird	1
MDLMH09	Mandalay	M Hill	24	7	2019	5	53	Coppersmith Barbet	1
MDLMH10	Mandalay	M Hill	24	7	2019	5	38	Coppersmith Barbet	1
MDLMH06	Mandalay	M Hill	24	7	2019	6	56	Eurasian Tree Sparrow	3
MDLMH09	Mandalay	M Hill	24	7	2019	5	52	Greater Coucal	3
MDLMH10	Mandalay	M Hill	24	7	2019	5	38	Greater Coucal	1
MDLMH03	Mandalay	M Hill	24	7	2019	7	37	Himalayan Swiftlet	1
MDLMH06	Mandalay	M Hill	24	7	2019	6	57	House Sparrow	2
MDLMH04	Mandalay	M Hill	24	7	2019	7	54	House Swift	100
MDLMH05	Mandalay	M Hill	24	7	2019	7	21	House Swift	2
MDLMH06	Mandalay	M Hill	24	7	2019	6	55	House Swift	9
MDLMH07	Mandalay	M Hill	24	7	2019	6	32	House Swift	2
MDLMH07	Mandalay	M Hill	24	7	2019	6	34	House Swift	1
MDLMH08	Mandalay	M Hill	24	7	2019	6	22	House Swift	1
MDLMH09	Mandalay	M Hill	24	7	2019	5	55	House Swift	2
MDLMH01	Mandalay	M Hill	24	7	2019	8	49	Little Green Bee-eater	4
MDLMH06	Mandalay	M Hill	24	7	2019	7	0	Oriental Magpie Robin	1
MDLMH09	Mandalay	M Hill	24	7	2019	5	54	Oriental Magpie Robin	2
MDLMH01	Mandalay	M Hill	24	7	2019	8	51	Purple Sunbird	1
MDLMH05	Mandalay	M Hill	24	7	2019	7	17	Purple Sunbird	1
MDLMH06	Mandalay	M Hill	24	7	2019	6	58	Purple Sunbird	1
MDLMH07	Mandalay	M Hill	24	7	2019	6	37	Purple Sunbird	1
MDLMH09	Mandalay	M Hill	24	7	2019	5	52	Purple Sunbird	1
MDLMH01	Mandalay	M Hill	24	7	2019	8	52	Red-vented Bulbul	2
MDLMH02	Mandalay	M Hill	24	7	2019	8	31	Red-vented Bulbul	20
MDLMH03	Mandalay	M Hill	24	7	2019	7	31	Red-vented Bulbul	3
MDLMH05	Mandalay	M Hill	24	7	2019	7	23	Red-vented Bulbul	1
MDLMH06	Mandalay	M Hill	24	7	2019	6	55	Red-vented Bulbul	2
MDLMH07	Mandalay	M Hill	24	7	2019	6	31	Red-vented Bulbul	1
MDLMH08	Mandalay	M Hill	24	7	2019	6	16	Red-vented Bulbul	7
MDLMH09	Mandalay	M Hill	24	7	2019	5	52	Red-vented Bulbul	4
MDLMH10	Mandalay	M Hill	24	7	2019	5	32	Red-vented Bulbul	1
MDLMH01	Mandalay	M Hill	24	7	2019	8	47	Rock Pigeon	20
MDLMH02	Mandalay	M Hill	24	7	2019	8	33	Rock Pigeon	1
MDLMH06	Mandalay	M Hill	24	7	2019	7	0	Rock Pigeon	3
MDLMH07	Mandalay	M Hill	24	7	2019	6	38	Rock Pigeon	1
MDLMH08	Mandalay	M Hill	24	7	2019	6	20	Rock Pigeon	3
MDLMH06	Mandalay	M Hill	24	7	2019	6	54	Scaly-breasted Munia	4
MDLMH07	Mandalay	M Hill	24	7	2019	6	32	Scaly-breasted Munia	1
MDLMH08	Mandalay	M Hill	24	7	2019	6	22	Scaly-breasted Munia	2
MDLMH09	Mandalay	M Hill	24	7	2019	5	55	Scaly-breasted Munia	3
MDLMH02	Mandalay	M Hill	24	7	2019	8	32	Spotted Dove	1
MDLMH03	Mandalay	M Hill	24	7	2019	7	33	Spotted Dove	4
MDLMH07	Mandalay	M Hill	24	7	2019	6	33	Spotted Dove	1
MDLMH09	Mandalay	M Hill	24	7	2019	5	53	Spotted Dove	2
MDLMH10	Mandalay	M Hill	24	7	2019	5	34	Spotted Dove	3
MDLMH01	Mandalay	M Hill	24	7	2019	8	49	Venous-breasted Myna	1
MDLMH03	Mandalay	M Hill	24	7	2019	7	30	White-throated Babbler	9
MDLMH05	Mandalay	M Hill	24	7	2019	7	18	White-throated Babbler	2
MDLMH07	Mandalay	M Hill	24	7	2019	6	33	White-throated Babbler	9
MDLMH08	Mandalay	M Hill	24	7	2019	6	14	White-throated Babbler	3
MDLMH09	Mandalay	M Hill	24	7	2019	5	50	White-throated Babbler	5
MDLMH10	Mandalay	M Hill	24	7	2019	5	36	White-throated Babbler	2
MDLMH10	Mandalay	M Hill	24	7	2019	5	41	White-throated Kingfisher	1
MAWMH09	Mawlamyine	M Hill	10	3	2019	7	8	Ayeyarwaddy Bulbul	1
MAWMH05	Mawlamyine	M Hill	10	3	2019	8	10	Black Drongo	3
MAWMH06	Mawlamyine	M Hill	10	3	2019	8	27	Black Drongo	3
MAWMH07	Mawlamyine	M Hill	10	3	2019	6	29	Black Drongo	5
MAWMH09	Mawlamyine	M Hill	10	3	2019	7	8	Black Drongo	1
MAWMH10	Mawlamyine	M Hill	10	3	2019	7	26	Black Drongo	1
MAWMH05	Mawlamyine	M Hill	10	3	2019	8	10	Black-crested Bulbul	2
MAWMH10	Mawlamyine	M Hill	10	3	2019	7	26	Black-crested Bulbul	2
MAWMH01	Mawlamyine	M Hill	10	3	2019	9	25	Common Iora	1
MAWMH04	Mawlamyine	M Hill	10	3	2019	6	9	Common Iora	1
MAWMH02	Mawlamyine	M Hill	10	3	2019	9	4	Common Kestrel	1
MAWMH10	Mawlamyine	M Hill	10	3	2019	7	26	Common Kestrel	1
MAWMH05	Mawlamyine	M Hill	10	3	2019	8	10	Common Tailorbird	1
MAWMH10	Mawlamyine	M Hill	10	3	2019	7	26	Dusky Warbler	1
MAWMH03	Mawlamyine	M Hill	10	3	2019	5	46	Indian Nightjar	3
MAWMH09	Mawlamyine	M Hill	10	3	2019	7	8	Lineated Barbet	1
MAWMH10	Mawlamyine	M Hill	10	3	2019	7	26	Lineated Barbet	1
MAWMH04	Mawlamyine	M Hill	10	3	2019	6	9	Little Green Bee-eater	1
MAWMH07	Mawlamyine	M Hill	10	3	2019	6	29	Little Green Bee-eater	1
MAWMH09	Mawlamyine	M Hill	10	3	2019	7	8	Olive-backed Pipit	1
MAWMH04	Mawlamyine	M Hill	10	3	2019	6	9	Olive-backed Sunbird	2
MAWMH05	Mawlamyine	M Hill	10	3	2019	8	10	Olive-backed Sunbird	2
MAWMH02	Mawlamyine	M Hill	10	3	2019	9	4	Puff-throated Babbler	1
MAWMH05	Mawlamyine	M Hill	10	3	2019	8	10	Red Junglefowl	1
MAWMH02	Mawlamyine	M Hill	10	3	2019	9	4	Red-vented Bulbul	2
MAWMH04	Mawlamyine	M Hill	10	3	2019	6	9	Red-vented Bulbul	3
MAWMH06	Mawlamyine	M Hill	10	3	2019	8	27	Red-vented Bulbul	5
MAWMH08	Mawlamyine	M Hill	10	3	2019	6	50	Red-vented Bulbul	3
MAWMH09	Mawlamyine	M Hill	10	3	2019	7	8	Red-vented Bulbul	4
MAWMH10	Mawlamyine	M Hill	10	3	2019	7	26	Red-vented Bulbul	2
MAWMH02	Mawlamyine	M Hill	10	3	2019	9	4	Red-whiskered Bulbul	2
MAWMH03	Mawlamyine	M Hill	10	3	2019	5	46	Red-whiskered Bulbul	1
MAWMH05	Mawlamyine	M Hill	10	3	2019	8	10	Red-whiskered Bulbul	1
MAWMH06	Mawlamyine	M Hill	10	3	2019	8	27	Red-whiskered Bulbul	1
MAWMH07	Mawlamyine	M Hill	10	3	2019	6	29	Red-whiskered Bulbul	4
MAWMH08	Mawlamyine	M Hill	10	3	2019	6	50	Red-whiskered Bulbul	2
MAWMH09	Mawlamyine	M Hill	10	3	2019	7	8	Red-whiskered Bulbul	3
MAWMH10	Mawlamyine	M Hill	10	3	2019	7	26	Red-whiskered Bulbul	2
MAWMH10	Mawlamyine	M Hill	10	3	2019	7	26	Rocket-tailed Treepie	2
MAWMH09	Mawlamyine	M Hill	10	3	2019	7	8	Spotted Dove	1
MAWMH05	Mawlamyine	M Hill	10	3	2019	8	10	Stripe-throated Bulbul	2
MAWMH07	Mawlamyine	M Hill	10	3	2019	6	29	Thick-billed Green-pigeon	4
MAWMH01	Mawlamyine	M Hill	10	3	2019	9	25	Warbler sp.	1
MAWMH02	Mawlamyine	M Hill	10	3	2019	9	4	Warbler sp.	1
MGZMH08	Myeik	M Hill	4	3	2019	6	55	Amur Falcon	1
MGZMH01	Myeik	M Hill	4	3	2019	7	17	Ashy Drongo	1
MGZMH09	Myeik	M Hill	4	3	2019	6	39	Asian Koel	1
MGZMH06	Myeik	M Hill	4	3	2019	10	8	Barn Swallow	1
MGZMH07	Myeik	M Hill	4	3	2019	10	23	Barn Swallow	2
MGZMH02	Myeik	M Hill	4	3	2019	7	45	Black Drongo	1
MGZMH06	Myeik	M Hill	4	3	2019	10	8	Black Drongo	1
MGZMH01	Myeik	M Hill	4	3	2019	7	18	Black-naped Oriole	1
MGZMH03	Myeik	M Hill	4	3	2019	8	15	Black-naped Oriole	1
MGZMH05	Myeik	M Hill	4	3	2019	9	48	Black-naped Oriole	1
MGZMH09	Myeik	M Hill	4	3	2019	6	48	Black-naped Oriole	1
MGZMH03	Myeik	M Hill	4	3	2019	8	15	Brahminy Kite	1
MGZMH07	Myeik	M Hill	4	3	2019	10	32	Brahminy Kite	1
MGZMH08	Myeik	M Hill	4	3	2019	7	1	Brahminy Kite	2
MGZMH05	Myeik	M Hill	4	3	2019	9	48	Brown Shrike	1
MGZMH07	Myeik	M Hill	4	3	2019	10	23	Brown Shrike	1
MGZMH02	Myeik	M Hill	4	3	2019	7	45	Common Hill-myna	1
MGZMH05	Myeik	M Hill	4	3	2019	9	48	Common Myna	1
MGZMH06	Myeik	M Hill	4	3	2019	10	8	Common Myna	2
MGZMH09	Myeik	M Hill	4	3	2019	6	47	Common Tailorbird	1
MGZMH04	Myeik	M Hill	4	3	2019	8	58	Crested Serpent-eagle	2
MGZMH10	Myeik	M Hill	4	3	2019	8	43	Crested Serpent-eagle	1
MGZMH01	Myeik	M Hill	4	3	2019	7	17	Edible-nest Swiftlet	10
MGZMH03	Myeik	M Hill	4	3	2019	8	15	Edible-nest Swiftlet	1
MGZMH04	Myeik	M Hill	4	3	2019	8	58	Edible-nest Swiftlet	1
MGZMH05	Myeik	M Hill	4	3	2019	9	48	Edible-nest Swiftlet	1
MGZMH09	Myeik	M Hill	4	3	2019	6	47	Edible-nest Swiftlet	1
MGZMH07	Myeik	M Hill	4	3	2019	10	23	Eurasian Tree Sparrow	1
MGZMH02	Myeik	M Hill	4	3	2019	7	45	Greater Coucal	1
MGZMH09	Myeik	M Hill	4	3	2019	6	39	Greater Coucal	1
MGZMH01	Myeik	M Hill	4	3	2019	7	18	House Crow	1
MGZMH03	Myeik	M Hill	4	3	2019	8	25	House Crow	1
MGZMH07	Myeik	M Hill	4	3	2019	10	23	House Crow	1
MGZMH02	Myeik	M Hill	4	3	2019	7	49	Lineated Barbet	1
MGZMH08	Myeik	M Hill	4	3	2019	6	55	Little Cormorant	1
MGZMH05	Myeik	M Hill	4	3	2019	9	48	Little Grebe	5
MGZMH08	Myeik	M Hill	4	3	2019	6	55	Little Grebe	2
MGZMH01	Myeik	M Hill	4	3	2019	7	23	Olive-backed Sunbird	1
MGZMH07	Myeik	M Hill	4	3	2019	10	23	Olive-backed Sunbird	1
MGZMH09	Myeik	M Hill	4	3	2019	6	39	Olive-backed Sunbird	1
MGZMH05	Myeik	M Hill	4	3	2019	9	48	Oriental Magpie Robin	1
MGZMH05	Myeik	M Hill	4	3	2019	9	48	Oriental White-eye	2
MGZMH06	Myeik	M Hill	4	3	2019	10	8	Oriental White-eye	1
MGZMH08	Myeik	M Hill	4	3	2019	7	5	Oriental White-eye	8
MGZMH05	Myeik	M Hill	4	3	2019	9	48	Pond Heron	1
MGZMH06	Myeik	M Hill	4	3	2019	10	8	Pond Heron	1
MGZMH04	Myeik	M Hill	4	3	2019	9	7	Red-whiskered Bulbul	1
MGZMH01	Myeik	M Hill	4	3	2019	7	18	Scarlet-backed Flowerpecker	1
MGZMH03	Myeik	M Hill	4	3	2019	8	15	Scarlet-backed Flowerpecker	1
MGZMH05	Myeik	M Hill	4	3	2019	9	58	Scarlet-backed Flowerpecker	2
MGZMH08	Myeik	M Hill	4	3	2019	6	55	Scarlet-backed Flowerpecker	1
MGZMH09	Myeik	M Hill	4	3	2019	6	39	Scarlet-backed Flowerpecker	1
MGZMH02	Myeik	M Hill	4	3	2019	7	49	Shikra	1
MGZMH02	Myeik	M Hill	4	3	2019	7	45	Stripe-throated Bulbul	1
MGZMH04	Myeik	M Hill	4	3	2019	8	58	Stripe-throated Bulbul	1
MGZMH08	Myeik	M Hill	4	3	2019	6	55	Stripe-throated Bulbul	1
MGZMH10	Myeik	M Hill	4	3	2019	8	45	Vernal Hanging-parrot	1
MGZMH02	Myeik	M Hill	4	3	2019	7	45	Warbler sp.	1
MGZMH04	Myeik	M Hill	4	3	2019	8	58	Warbler sp.	1
MGZMH06	Myeik	M Hill	4	3	2019	10	17	Warbler sp.	1
MGZMH09	Myeik	M Hill	4	3	2019	6	41	Warbler sp.	1
MGZMH10	Myeik	M Hill	4	3	2019	8	36	Warbler sp.	1
MGZMH07	Myeik	M Hill	4	3	2019	10	23	White Wagtail	1
MGZMH02	Myeik	M Hill	4	3	2019	7	55	White-rumped Munia	1
MGZMH04	Myeik	M Hill	4	3	2019	8	58	White-rumped Munia	1
MGZMH09	Myeik	M Hill	4	3	2019	6	49	White-rumped Munia	1
MGZMH02	Myeik	M Hill	4	3	2019	7	45	Yellow-vented Bulbul	1
MGZMH06	Myeik	M Hill	4	3	2019	10	8	Yellow-vented Bulbul	2
MGZMH08	Myeik	M Hill	4	3	2019	7	1	Yellow-vented Bulbul	1
MGZMH09	Myeik	M Hill	4	3	2019	6	47	Yellow-vented Bulbul	3
MGZPF03	Myeik	Paddy field	5	3	2019	6	32	Asian Brown Flycatcher	1
MDLPF02	Mandalay	Paddy field	25	7	2019	6	13	Asian Openbill	2
MDLPF10	Mandalay	Paddy field	25	7	2019	5	34	Asian Openbill	15
MAWPF01	Mawlamyine	Paddy field	11	3	2019	7	39	Asian Palm Swift	3
MAWPF03	Mawlamyine	Paddy field	11	3	2019	8	14	Asian Palm Swift	5
MAWPF04	Mawlamyine	Paddy field	11	3	2019	8	30	Asian Palm Swift	4
MAWPF07	Mawlamyine	Paddy field	11	3	2019	6	27	Asian Palm Swift	4
MAWPF08	Mawlamyine	Paddy field	11	3	2019	6	3	Asian Palm Swift	1
MAWPF09	Mawlamyine	Paddy field	11	3	2019	9	29	Asian Palm Swift	5
MAWPF10	Mawlamyine	Paddy field	11	3	2019	9	6	Asian Palm Swift	2
MDLPF01	Mandalay	Paddy field	25	7	2019	6	0	Asian Palm Swift	1
MDLPF03	Mandalay	Paddy field	25	7	2019	6	29	Asian Palm Swift	2
MDLPF05	Mandalay	Paddy field	25	7	2019	7	10	Asian Palm Swift	7
MGZPF08	Myeik	Paddy field	5	3	2019	9	9	Asian Pied Starling	2
MDLPF02	Mandalay	Paddy field	25	7	2019	6	16	Ayeyarwaddy Bulbul	1
MDLPF03	Mandalay	Paddy field	25	7	2019	6	28	Ayeyarwaddy Bulbul	4
MDLPF09	Mandalay	Paddy field	25	7	2019	8	20	Ayeyarwaddy Bulbul	4
MAWPF01	Mawlamyine	Paddy field	11	3	2019	7	39	Barn Swallow	1
MAWPF02	Mawlamyine	Paddy field	11	3	2019	7	57	Barn Swallow	1
MAWPF05	Mawlamyine	Paddy field	11	3	2019	7	9	Barn Swallow	2
MAWPF06	Mawlamyine	Paddy field	11	3	2019	6	47	Barn Swallow	8
MDLPF01	Mandalay	Paddy field	25	7	2019	5	59	Barn Swallow	3
MDLPF02	Mandalay	Paddy field	25	7	2019	6	15	Barn Swallow	1
MDLPF03	Mandalay	Paddy field	25	7	2019	6	34	Barn Swallow	2
MDLPF05	Mandalay	Paddy field	25	7	2019	7	8	Barn Swallow	2
MGZPF05	Myeik	Paddy field	5	3	2019	10	7	Barn Swallow	3
MGZPF09	Myeik	Paddy field	5	3	2019	8	53	Barn Swallow	5
MDLPF06	Mandalay	Paddy field	25	7	2019	7	39	Baya Weaver	6
MAWPF01	Mawlamyine	Paddy field	11	3	2019	7	39	Black Drongo	5
MAWPF02	Mawlamyine	Paddy field	11	3	2019	7	57	Black Drongo	1
MAWPF03	Mawlamyine	Paddy field	11	3	2019	8	14	Black Drongo	5
MAWPF04	Mawlamyine	Paddy field	11	3	2019	8	30	Black Drongo	5
MAWPF06	Mawlamyine	Paddy field	11	3	2019	6	47	Black Drongo	3
MAWPF07	Mawlamyine	Paddy field	11	3	2019	6	27	Black Drongo	3
MAWPF08	Mawlamyine	Paddy field	11	3	2019	6	3	Black Drongo	2
MAWPF09	Mawlamyine	Paddy field	11	3	2019	9	29	Black Drongo	3
MAWPF10	Mawlamyine	Paddy field	11	3	2019	9	6	Black Drongo	1
MDLPF01	Mandalay	Paddy field	25	7	2019	5	56	Black Drongo	1
MDLPF03	Mandalay	Paddy field	25	7	2019	6	31	Black Drongo	1
MDLPF04	Mandalay	Paddy field	25	7	2019	6	52	Black Drongo	2
MDLPF05	Mandalay	Paddy field	25	7	2019	7	8	Black Drongo	1
MDLPF08	Mandalay	Paddy field	25	7	2019	8	4	Black Drongo	1
MDLPF10	Mandalay	Paddy field	25	7	2019	5	37	Black Drongo	2
MGZPF02	Myeik	Paddy field	5	3	2019	7	0	Black Drongo	2
MGZPF03	Myeik	Paddy field	5	3	2019	6	42	Black Drongo	1
MGZPF04	Myeik	Paddy field	5	3	2019	7	54	Black Drongo	1
MGZPF05	Myeik	Paddy field	5	3	2019	9	57	Black Drongo	3
MGZPF07	Myeik	Paddy field	5	3	2019	9	34	Black Drongo	1
MGZPF08	Myeik	Paddy field	5	3	2019	9	9	Black Drongo	3
MGZPF09	Myeik	Paddy field	5	3	2019	8	53	Black Drongo	2
MAWPF03	Mawlamyine	Paddy field	11	3	2019	8	14	Black Kite	1
MAWPF10	Mawlamyine	Paddy field	11	3	2019	9	6	Black Kite	1
MGZPF06	Myeik	Paddy field	5	3	2019	9	51	Black Kite	2
MGZPF08	Myeik	Paddy field	5	3	2019	9	19	Black Kite	1
MGZPF08	Myeik	Paddy field	5	3	2019	9	9	Black Kite	3
MDLPF10	Mandalay	Paddy field	25	7	2019	5	38	Black-shouldered Kite	1
MGZPF01	Myeik	Paddy field	5	3	2019	6	4	Black-shouldered Kite	1
MGZPF02	Myeik	Paddy field	5	3	2019	7	0	Black-shouldered Kite	2
MDLPF02	Mandalay	Paddy field	25	7	2019	6	13	Blue-tailed Bee-eater	1
MDLPF03	Mandalay	Paddy field	25	7	2019	6	37	Blue-tailed Bee-eater	1
MDLPF05	Mandalay	Paddy field	25	7	2019	7	10	Blue-tailed Bee-eater	1
MDLPF06	Mandalay	Paddy field	25	7	2019	7	34	Blue-tailed Bee-eater	3
MAWPF05	Mawlamyine	Paddy field	11	3	2019	7	9	Bluethroat	2
MGZPF02	Myeik	Paddy field	5	3	2019	7	0	Brahminy Kite	1
MGZPF10	Myeik	Paddy field	5	3	2019	8	8	Brahminy Kite	1
MAWPF05	Mawlamyine	Paddy field	11	3	2019	7	9	Brown Shrike	2
MAWPF09	Mawlamyine	Paddy field	11	3	2019	9	29	Brown Shrike	1
MGZPF01	Myeik	Paddy field	5	3	2019	6	4	Brown Shrike	1
MGZPF09	Myeik	Paddy field	5	3	2019	8	53	Brown Shrike	1
MAWPF04	Mawlamyine	Paddy field	11	3	2019	8	30	Cattle Egret	9
MDLPF10	Mandalay	Paddy field	25	7	2019	5	42	Cattle Egret	1
MGZPF04	Myeik	Paddy field	5	3	2019	7	54	Cattle Egret	4
MGZPF08	Myeik	Paddy field	5	3	2019	9	9	Cattle Egret	6
MGZPF10	Myeik	Paddy field	5	3	2019	8	8	Cattle Egret	3
MAWPF02	Mawlamyine	Paddy field	11	3	2019	7	57	Chestnut Munia	2
MDLPF01	Mandalay	Paddy field	25	7	2019	6	1	Cinnamon Bittern	2
MDLPF02	Mandalay	Paddy field	25	7	2019	6	20	Cinnamon Bittern	1
MDLPF04	Mandalay	Paddy field	25	7	2019	6	47	Cinnamon Bittern	1
MDLPF07	Mandalay	Paddy field	25	7	2019	7	55	Cinnamon Bittern	1
MDLPF08	Mandalay	Paddy field	25	7	2019	8	7	Cinnamon Bittern	1
MDLPF10	Mandalay	Paddy field	25	7	2019	5	44	Cinnamon Bittern	1
MGZPF03	Myeik	Paddy field	5	3	2019	6	32	Collared Kingfisher	1
MGZPF04	Myeik	Paddy field	5	3	2019	7	54	Collared Kingfisher	1
MDLPF06	Mandalay	Paddy field	25	7	2019	7	34	Common Iora	2
MDLPF09	Mandalay	Paddy field	25	7	2019	8	20	Common Iora	1
MDLPF10	Mandalay	Paddy field	25	7	2019	5	36	Common Iora	1
MGZPF03	Myeik	Paddy field	5	3	2019	6	32	Common Iora	1
MGZPF09	Myeik	Paddy field	5	3	2019	8	53	Common Kestrel	1
MDLPF02	Mandalay	Paddy field	25	7	2019	6	13	Common Kingfisher	1
MAWPF03	Mawlamyine	Paddy field	11	3	2019	8	14	Common Myna	3
MAWPF04	Mawlamyine	Paddy field	11	3	2019	8	30	Common Myna	2
MAWPF05	Mawlamyine	Paddy field	11	3	2019	7	9	Common Myna	3
MAWPF06	Mawlamyine	Paddy field	11	3	2019	6	47	Common Myna	2
MAWPF07	Mawlamyine	Paddy field	11	3	2019	6	27	Common Myna	2
MAWPF08	Mawlamyine	Paddy field	11	3	2019	6	3	Common Myna	6
MAWPF09	Mawlamyine	Paddy field	11	3	2019	9	29	Common Myna	2
MAWPF10	Mawlamyine	Paddy field	11	3	2019	9	6	Common Myna	2
MDLPF06	Mandalay	Paddy field	25	7	2019	7	34	Common Myna	2
MDLPF07	Mandalay	Paddy field	25	7	2019	7	54	Common Myna	1
MDLPF08	Mandalay	Paddy field	25	7	2019	8	2	Common Myna	4
MDLPF09	Mandalay	Paddy field	25	7	2019	8	19	Common Myna	3
MDLPF10	Mandalay	Paddy field	25	7	2019	5	39	Common Myna	2
MGZPF01	Myeik	Paddy field	5	3	2019	6	4	Common Myna	2
MGZPF02	Myeik	Paddy field	5	3	2019	7	0	Common Myna	3
MGZPF03	Myeik	Paddy field	5	3	2019	6	32	Common Myna	1
MGZPF04	Myeik	Paddy field	5	3	2019	7	54	Common Myna	2
MGZPF06	Myeik	Paddy field	5	3	2019	9	41	Common Myna	1
MGZPF10	Myeik	Paddy field	5	3	2019	8	8	Common Myna	11
MDLPF02	Mandalay	Paddy field	25	7	2019	6	16	Common Tailorbird	1
MGZPF04	Myeik	Paddy field	5	3	2019	8	4	Common Tailorbird	1
MGZPF01	Myeik	Paddy field	5	3	2019	6	4	Dusky Warbler	1
MGZPF04	Myeik	Paddy field	5	3	2019	7	54	Dusky Warbler	1
MAWPF01	Mawlamyine	Paddy field	11	3	2019	7	39	Eastern Stonechat	2
MAWPF02	Mawlamyine	Paddy field	11	3	2019	7	57	Eastern Stonechat	3
MAWPF04	Mawlamyine	Paddy field	11	3	2019	8	30	Eastern Stonechat	1
MAWPF05	Mawlamyine	Paddy field	11	3	2019	7	9	Eastern Stonechat	4
MAWPF06	Mawlamyine	Paddy field	11	3	2019	6	47	Eastern Stonechat	3
MAWPF07	Mawlamyine	Paddy field	11	3	2019	6	27	Eastern Stonechat	1
MAWPF08	Mawlamyine	Paddy field	11	3	2019	6	3	Eastern Stonechat	1
MAWPF09	Mawlamyine	Paddy field	11	3	2019	9	29	Eastern Stonechat	2
MAWPF10	Mawlamyine	Paddy field	11	3	2019	9	6	Eastern Stonechat	1
MGZPF06	Myeik	Paddy field	5	3	2019	9	41	Eastern Stonechat	2
MGZPF07	Myeik	Paddy field	5	3	2019	9	24	Eastern Stonechat	4
MGZPF08	Myeik	Paddy field	5	3	2019	9	9	Eastern Stonechat	2
MGZPF09	Myeik	Paddy field	5	3	2019	8	53	Eastern Stonechat	2
MGZPF10	Myeik	Paddy field	5	3	2019	8	18	Eastern Stonechat	2
MGZPF01	Myeik	Paddy field	5	3	2019	6	4	Edible-nest Swiftlet	30
MGZPF04	Myeik	Paddy field	5	3	2019	7	54	Edible-nest Swiftlet	12
MGZPF06	Myeik	Paddy field	5	3	2019	9	41	Edible-nest Swiftlet	9
MGZPF07	Myeik	Paddy field	5	3	2019	9	24	Edible-nest Swiftlet	5
MGZPF08	Myeik	Paddy field	5	3	2019	9	9	Edible-nest Swiftlet	20
MGZPF09	Myeik	Paddy field	5	3	2019	8	53	Edible-nest Swiftlet	20
MGZPF10	Myeik	Paddy field	5	3	2019	8	8	Edible-nest Swiftlet	5
MDLPF01	Mandalay	Paddy field	25	7	2019	5	59	Glossy Ibis	66
MDLPF02	Mandalay	Paddy field	25	7	2019	6	17	Glossy Ibis	6
MDLPF04	Mandalay	Paddy field	25	7	2019	6	45	Glossy Ibis	5
MDLPF05	Mandalay	Paddy field	25	7	2019	7	5	Glossy Ibis	4
MDLPF06	Mandalay	Paddy field	25	7	2019	7	32	Glossy Ibis	27
MDLPF07	Mandalay	Paddy field	25	7	2019	7	54	Glossy Ibis	15
MDLPF08	Mandalay	Paddy field	25	7	2019	8	3	Glossy Ibis	1
MDLPF10	Mandalay	Paddy field	25	7	2019	5	34	Glossy Ibis	4
MGZPF03	Myeik	Paddy field	5	3	2019	6	32	Golden-bellied Gerygone	1
MDLPF02	Mandalay	Paddy field	25	7	2019	6	12	Great Egret	1
MDLPF08	Mandalay	Paddy field	25	7	2019	8	8	Greater Coucal	1
MGZPF03	Myeik	Paddy field	5	3	2019	6	32	Greater Racked-tailed Drongo	1
MDLPF01	Mandalay	Paddy field	25	7	2019	5	59	Grey-breasted Prinia	1
MGZPF03	Myeik	Paddy field	5	3	2019	6	32	Harrier sp.	1
MDLPF01	Mandalay	Paddy field	25	7	2019	6	5	House Crow	1
MDLPF02	Mandalay	Paddy field	25	7	2019	6	12	House Crow	8
MDLPF03	Mandalay	Paddy field	25	7	2019	6	36	House Crow	2
MDLPF07	Mandalay	Paddy field	25	7	2019	7	50	House Crow	3
MDLPF08	Mandalay	Paddy field	25	7	2019	8	9	House Crow	1
MDLPF09	Mandalay	Paddy field	25	7	2019	8	18	House Crow	8
MDLPF10	Mandalay	Paddy field	25	7	2019	5	39	House Crow	4
MGZPF02	Myeik	Paddy field	5	3	2019	7	0	House Crow	2
MGZPF03	Myeik	Paddy field	5	3	2019	6	32	House Crow	6
MAWPF07	Mawlamyine	Paddy field	11	3	2019	6	27	House Sparrow	3
MDLPF09	Mandalay	Paddy field	25	7	2019	8	22	House Sparrow	2
MAWPF03	Mawlamyine	Paddy field	11	3	2019	8	14	Intermediate Egret	1
MDLPF02	Mandalay	Paddy field	25	7	2019	6	20	Intermediate Egret	1
MDLPF04	Mandalay	Paddy field	25	7	2019	6	50	Intermediate Egret	1
MDLPF05	Mandalay	Paddy field	25	7	2019	7	7	Intermediate Egret	2
MDLPF07	Mandalay	Paddy field	25	7	2019	7	49	Intermediate Egret	1
MDLPF01	Mandalay	Paddy field	25	7	2019	5	57	Jungle Myna	12
MDLPF02	Mandalay	Paddy field	25	7	2019	6	12	Jungle Myna	10
MDLPF03	Mandalay	Paddy field	25	7	2019	6	28	Jungle Myna	1
MDLPF04	Mandalay	Paddy field	25	7	2019	6	51	Jungle Myna	1
MDLPF06	Mandalay	Paddy field	25	7	2019	7	37	Jungle Myna	7
MDLPF08	Mandalay	Paddy field	25	7	2019	8	3	Jungle Myna	3
MDLPF09	Mandalay	Paddy field	25	7	2019	8	18	Jungle Myna	5
MDLPF10	Mandalay	Paddy field	25	7	2019	5	41	Jungle Myna	1
MGZPF01	Myeik	Paddy field	5	3	2019	6	14	Jungle Myna	1
MGZPF02	Myeik	Paddy field	5	3	2019	7	0	Jungle Myna	50
MGZPF03	Myeik	Paddy field	5	3	2019	6	32	Jungle Myna	15
MGZPF04	Myeik	Paddy field	5	3	2019	7	54	Jungle Myna	20
MGZPF08	Myeik	Paddy field	5	3	2019	9	9	Jungle Myna	2
MAWPF09	Mawlamyine	Paddy field	11	3	2019	9	29	Large-billed Crow	1
MAWPF10	Mawlamyine	Paddy field	11	3	2019	9	6	Large-billed Crow	1
MDLPF10	Mandalay	Paddy field	25	7	2019	5	38	Large-billed Crow	1
MGZPF01	Myeik	Paddy field	5	3	2019	6	4	Large-billed Crow	2
MGZPF04	Myeik	Paddy field	5	3	2019	7	54	Large-billed Crow	1
MDLPF06	Mandalay	Paddy field	25	7	2019	7	39	Lesser Whistling Duck	1
MDLPF02	Mandalay	Paddy field	25	7	2019	6	19	Little Cormorant	1
MDLPF03	Mandalay	Paddy field	25	7	2019	6	31	Little Cormorant	1
MDLPF04	Mandalay	Paddy field	25	7	2019	6	54	Little Cormorant	1
MDLPF05	Mandalay	Paddy field	25	7	2019	7	2	Little Cormorant	2
MDLPF06	Mandalay	Paddy field	25	7	2019	7	33	Little Cormorant	2
MDLPF07	Mandalay	Paddy field	25	7	2019	7	51	Little Cormorant	1
MAWPF04	Mawlamyine	Paddy field	11	3	2019	8	30	Little Egret	1
MDLPF01	Mandalay	Paddy field	25	7	2019	5	57	Little Egret	4
MDLPF03	Mandalay	Paddy field	25	7	2019	6	30	Little Egret	2
MDLPF05	Mandalay	Paddy field	25	7	2019	7	1	Little Egret	3
MDLPF07	Mandalay	Paddy field	25	7	2019	7	47	Little Egret	2
MDLPF08	Mandalay	Paddy field	25	7	2019	8	5	Little Egret	1
MDLPF10	Mandalay	Paddy field	25	7	2019	5	35	Little Egret	6
MGZPF10	Myeik	Paddy field	5	3	2019	8	8	Little Egret	2
MAWPF05	Mawlamyine	Paddy field	11	3	2019	7	9	Little Green Bee-eater	1
MDLPF08	Mandalay	Paddy field	25	7	2019	8	6	Little Green Bee-eater	1
MDLPF09	Mandalay	Paddy field	25	7	2019	8	26	Little Green Bee-eater	1
MGZPF05	Myeik	Paddy field	5	3	2019	9	57	Little Green Bee-eater	1
MGZPF07	Myeik	Paddy field	5	3	2019	9	24	Little Green Bee-eater	1
MAWPF06	Mawlamyine	Paddy field	11	3	2019	6	47	Oriental Honey-buzzard	1
MAWPF07	Mawlamyine	Paddy field	11	3	2019	6	27	Oriental Honey-buzzard	1
MAWPF07	Mawlamyine	Paddy field	11	3	2019	6	27	Oriental Magpie Robin	1
MGZPF05	Myeik	Paddy field	5	3	2019	9	57	Oriental Skylark	1
MGZPF07	Myeik	Paddy field	5	3	2019	9	24	Oriental Skylark	2
MGZPF09	Myeik	Paddy field	5	3	2019	9	3	Oriental Skylark	1
MGZPF03	Myeik	Paddy field	5	3	2019	6	32	Oriental White-eye	1
MGZPF05	Myeik	Paddy field	5	3	2019	9	57	Paddyfield Pipit	1
MGZPF06	Myeik	Paddy field	5	3	2019	9	41	Paddyfield Pipit	2
MGZPF09	Myeik	Paddy field	5	3	2019	8	53	Paddyfield Pipit	1
MAWPF05	Mawlamyine	Paddy field	11	3	2019	7	9	Pied Bushchat	2
MAWPF08	Mawlamyine	Paddy field	11	3	2019	6	3	Pied Bushchat	1
MDLPF08	Mandalay	Paddy field	25	7	2019	8	4	Pied Bushchat	2
MDLPF01	Mandalay	Paddy field	25	7	2019	6	5	Pied Cuckoo	1
MDLPF06	Mandalay	Paddy field	25	7	2019	7	36	Pied Cuckoo	1
MAWPF02	Mawlamyine	Paddy field	11	3	2019	7	57	Pipit sp.	1
MAWPF02	Mawlamyine	Paddy field	11	3	2019	7	57	Plain Prinia	1
MAWPF05	Mawlamyine	Paddy field	11	3	2019	7	9	Plain Prinia	1
MDLPF01	Mandalay	Paddy field	25	7	2019	5	55	Plain Prinia	1
MDLPF02	Mandalay	Paddy field	25	7	2019	6	17	Plain Prinia	3
MDLPF03	Mandalay	Paddy field	25	7	2019	6	28	Plain Prinia	1
MDLPF04	Mandalay	Paddy field	25	7	2019	6	45	Plain Prinia	6
MDLPF05	Mandalay	Paddy field	25	7	2019	7	2	Plain Prinia	1
MDLPF06	Mandalay	Paddy field	25	7	2019	7	33	Plain Prinia	2
MDLPF09	Mandalay	Paddy field	25	7	2019	8	20	Plain Prinia	1
MDLPF10	Mandalay	Paddy field	25	7	2019	5	42	Plain Prinia	2
MAWPF04	Mawlamyine	Paddy field	11	3	2019	8	30	Plaintive Cuckoo	2
MAWPF10	Mawlamyine	Paddy field	11	3	2019	9	6	Plaintive Cuckoo	6
MDLPF01	Mandalay	Paddy field	25	7	2019	5	58	Pond Heron	1
MDLPF02	Mandalay	Paddy field	25	7	2019	6	13	Pond Heron	2
MDLPF02	Mandalay	Paddy field	25	7	2019	6	13	Pond Heron	5
MDLPF05	Mandalay	Paddy field	25	7	2019	7	8	Pond Heron	1
MDLPF07	Mandalay	Paddy field	25	7	2019	7	52	Pond Heron	2
MDLPF08	Mandalay	Paddy field	25	7	2019	8	4	Pond Heron	1
MDLPF09	Mandalay	Paddy field	25	7	2019	8	19	Pond Heron	2
MDLPF10	Mandalay	Paddy field	25	7	2019	5	36	Pond Heron	4
MGZPF01	Myeik	Paddy field	5	3	2019	6	4	Pond Heron	1
MGZPF02	Myeik	Paddy field	5	3	2019	7	0	Pond Heron	2
MGZPF04	Myeik	Paddy field	5	3	2019	7	54	Pond Heron	16
MDLPF03	Mandalay	Paddy field	25	7	2019	6	27	Purple Sunbird	2
MDLPF03	Mandalay	Paddy field	25	7	2019	6	31	Red Avadavat	15
MDLPF04	Mandalay	Paddy field	25	7	2019	6	50	Red Avadavat	1
MGZPF04	Myeik	Paddy field	5	3	2019	7	54	Red-breasted Parakeet	3
MAWPF01	Mawlamyine	Paddy field	11	3	2019	7	39	Red-vented Bulbul	2
MAWPF06	Mawlamyine	Paddy field	11	3	2019	6	47	Red-vented Bulbul	4
MAWPF07	Mawlamyine	Paddy field	11	3	2019	6	27	Red-vented Bulbul	2
MAWPF09	Mawlamyine	Paddy field	11	3	2019	9	29	Red-vented Bulbul	2
MDLPF01	Mandalay	Paddy field	25	7	2019	5	57	Red-vented Bulbul	5
MDLPF03	Mandalay	Paddy field	25	7	2019	6	27	Red-vented Bulbul	2
MDLPF10	Mandalay	Paddy field	25	7	2019	5	35	Red-vented Bulbul	1
MDLPF07	Mandalay	Paddy field	25	7	2019	7	50	Red-wattled Lapwing	2
MGZPF10	Myeik	Paddy field	5	3	2019	8	8	Red-wattled Lapwing	1
MAWPF07	Mawlamyine	Paddy field	11	3	2019	6	27	Red-whiskered Bulbul	1
MAWPF08	Mawlamyine	Paddy field	11	3	2019	6	3	Red-whiskered Bulbul	11
MAWPF09	Mawlamyine	Paddy field	11	3	2019	9	29	Rock Pigeon	3
MDLPF02	Mandalay	Paddy field	25	7	2019	6	19	Rock Pigeon	4
MDLPF03	Mandalay	Paddy field	25	7	2019	6	31	Rock Pigeon	5
MDLPF04	Mandalay	Paddy field	25	7	2019	6	49	Rock Pigeon	2
MDLPF08	Mandalay	Paddy field	25	7	2019	8	5	Rock Pigeon	1
MDLPF09	Mandalay	Paddy field	25	7	2019	8	18	Rock Pigeon	6
MAWPF01	Mawlamyine	Paddy field	11	3	2019	7	39	Scaly-breasted Munia	7
MAWPF05	Mawlamyine	Paddy field	11	3	2019	7	9	Scaly-breasted Munia	2
MAWPF07	Mawlamyine	Paddy field	11	3	2019	6	27	Scaly-breasted Munia	3
MDLPF01	Mandalay	Paddy field	25	7	2019	6	0	Scaly-breasted Munia	10
MDLPF03	Mandalay	Paddy field	25	7	2019	6	35	Scaly-breasted Munia	2
MDLPF04	Mandalay	Paddy field	25	7	2019	6	55	Scaly-breasted Munia	4
MDLPF05	Mandalay	Paddy field	25	7	2019	7	3	Scaly-breasted Munia	4
MDLPF06	Mandalay	Paddy field	25	7	2019	7	36	Scaly-breasted Munia	7
MDLPF07	Mandalay	Paddy field	25	7	2019	7	54	Scaly-breasted Munia	2
MDLPF08	Mandalay	Paddy field	25	7	2019	8	3	Scaly-breasted Munia	3
MDLPF09	Mandalay	Paddy field	25	7	2019	8	19	Scaly-breasted Munia	2
MDLPF10	Mandalay	Paddy field	25	7	2019	5	38	Scaly-breasted Munia	10
MGZPF02	Myeik	Paddy field	5	3	2019	7	0	Scaly-breasted Munia	100
MGZPF04	Myeik	Paddy field	5	3	2019	7	54	Scaly-breasted Munia	5
MGZPF05	Myeik	Paddy field	5	3	2019	9	57	Scaly-breasted Munia	1
MGZPF03	Myeik	Paddy field	5	3	2019	6	32	Small Minivet	1
MAWPF06	Mawlamyine	Paddy field	11	3	2019	6	47	Spotted Dove	1
MDLPF01	Mandalay	Paddy field	25	7	2019	5	56	Spotted Dove	1
MDLPF04	Mandalay	Paddy field	25	7	2019	6	50	Spotted Dove	3
MDLPF07	Mandalay	Paddy field	25	7	2019	7	53	Spotted Dove	3
MDLPF08	Mandalay	Paddy field	25	7	2019	8	9	Spotted Dove	1
MGZPF02	Myeik	Paddy field	5	3	2019	7	10	Spotted Dove	1
MGZPF03	Myeik	Paddy field	5	3	2019	6	32	Spotted Dove	1
MGZPF10	Myeik	Paddy field	5	3	2019	8	8	Spotted Dove	1
MDLPF04	Mandalay	Paddy field	25	7	2019	6	47	Watercock	1
MDLPF09	Mandalay	Paddy field	25	7	2019	8	23	White-breasted Waterhen	4
MGZPF02	Myeik	Paddy field	5	3	2019	7	0	White-rumped Munia	100
MDLPF05	Mandalay	Paddy field	25	7	2019	7	1	White-throated Kingfisher	1
MGZPF04	Myeik	Paddy field	5	3	2019	7	54	White-throated Kingfisher	2
MDLPF01	Mandalay	Paddy field	25	7	2019	6	1	White-vented Myna	6
MDLPF06	Mandalay	Paddy field	25	7	2019	7	32	White-vented Myna	5
MDLPF05	Mandalay	Paddy field	25	7	2019	7	6	Yellow Bittern	1
MDLPF06	Mandalay	Paddy field	25	7	2019	7	34	Yellow Bittern	1
MDLPF08	Mandalay	Paddy field	25	7	2019	8	10	Yellow Bittern	1
MDLPF01	Mandalay	Paddy field	25	7	2019	5	58	Yellow-eyed Babbler	1
MDLPF09	Mandalay	Paddy field	25	7	2019	8	18	Yellow-eyed Babbler	2
MGZPF10	Myeik	Paddy field	5	3	2019	8	8	Yellow-vented Bulbul	3
MAWPF01	Mawlamyine	Paddy field	11	3	2019	7	39	Zitting Cisticola	1
MAWPF03	Mawlamyine	Paddy field	11	3	2019	8	14	Zitting Cisticola	3
MAWPF07	Mawlamyine	Paddy field	11	3	2019	6	27	Zitting Cisticola	1
MDLPF04	Mandalay	Paddy field	25	7	2019	6	45	Zitting Cisticola	1
MGZPF01	Myeik	Paddy field	5	3	2019	6	4	Zitting Cisticola	4
MGZPF02	Myeik	Paddy field	5	3	2019	7	0	Zitting Cisticola	1
MGZPF04	Myeik	Paddy field	5	3	2019	7	54	Zitting Cisticola	1
MGZPF06	Myeik	Paddy field	5	3	2019	9	41	Zitting Cisticola	1
MGZUC04	Myeik	University Campus	3	3	2019	7	29	Asian Barred Owlet	1
MAWUC06	Mawlamyine	University Campus	9	3	2019	7	43	Asian Brown Flycatcher	1
MGZUC03	Myeik	University Campus	3	3	2019	7	12	Asian Brown Flycatcher	2
MGZUC04	Myeik	University Campus	3	3	2019	7	38	Asian Brown Flycatcher	1
MAWUC01	Mawlamyine	University Campus	9	3	2019	5	53	Asian Koel	1
MAWUC03	Mawlamyine	University Campus	9	3	2019	6	30	Asian Koel	1
MAWUC07	Mawlamyine	University Campus	9	3	2019	7	5	Asian Koel	1
MDLUC01	Mandalay	University Campus	23	7	2019	6	45	Asian Koel	1
MDLUC02	Mandalay	University Campus	23	7	2019	5	35	Asian Koel	1
MGZUC02	Myeik	University Campus	3	3	2019	6	35	Asian Koel	1
MGZUC05	Myeik	University Campus	3	3	2019	7	43	Asian Koel	1
MGZUC06	Myeik	University Campus	3	3	2019	8	19	Asian Koel	1
MGZUC07	Myeik	University Campus	3	3	2019	8	11	Asian Koel	1
MGZUC08	Myeik	University Campus	3	3	2019	5	53	Asian Koel	1
MAWUC01	Mawlamyine	University Campus	9	3	2019	5	53	Ayeyarwaddy Bulbul	1
MAWUC02	Mawlamyine	University Campus	9	3	2019	6	10	Ayeyarwaddy Bulbul	4
MAWUC04	Mawlamyine	University Campus	9	3	2019	6	49	Ayeyarwaddy Bulbul	2
MAWUC07	Mawlamyine	University Campus	9	3	2019	7	5	Ayeyarwaddy Bulbul	2
MAWUC09	Mawlamyine	University Campus	9	3	2019	8	18	Ayeyarwaddy Bulbul	2
MDLUC01	Mandalay	University Campus	23	7	2019	6	40	Ayeyarwaddy Bulbul	3
MDLUC02	Mandalay	University Campus	23	7	2019	5	40	Ayeyarwaddy Bulbul	4
MDLUC03	Mandalay	University Campus	23	7	2019	7	26	Ayeyarwaddy Bulbul	3
MDLUC05	Mandalay	University Campus	23	7	2019	7	15	Ayeyarwaddy Bulbul	2
MDLUC06	Mandalay	University Campus	23	7	2019	7	59	Ayeyarwaddy Bulbul	2
MDLUC07	Mandalay	University Campus	23	7	2019	6	26	Ayeyarwaddy Bulbul	7
MDLUC08	Mandalay	University Campus	23	7	2019	7	48	Ayeyarwaddy Bulbul	1
MDLUC09	Mandalay	University Campus	23	7	2019	6	7	Ayeyarwaddy Bulbul	2
MDLUC10	Mandalay	University Campus	23	7	2019	6	59	Ayeyarwaddy Bulbul	3
MDLUC07	Mandalay	University Campus	23	7	2019	6	28	Barn Swallow	1
MDLUC10	Mandalay	University Campus	23	7	2019	7	4	Barn Swallow	1
MGZUC08	Myeik	University Campus	3	3	2019	5	57	Barn Swallow	7
MAWUC02	Mawlamyine	University Campus	9	3	2019	6	10	Black Drongo	2
MAWUC03	Mawlamyine	University Campus	9	3	2019	6	30	Black Drongo	1
MAWUC06	Mawlamyine	University Campus	9	3	2019	7	43	Black Drongo	1
MAWUC07	Mawlamyine	University Campus	9	3	2019	7	5	Black Drongo	1
MAWUC08	Mawlamyine	University Campus	9	3	2019	8	2	Black Drongo	3
MAWUC10	Mawlamyine	University Campus	9	3	2019	8	39	Black Drongo	1
MDLUC02	Mandalay	University Campus	23	7	2019	5	35	Black Drongo	1
MDLUC05	Mandalay	University Campus	23	7	2019	7	14	Black Drongo	2
MDLUC08	Mandalay	University Campus	23	7	2019	7	50	Black Drongo	2
MGZUC03	Myeik	University Campus	3	3	2019	7	12	Black Drongo	1
MAWUC08	Mawlamyine	University Campus	9	3	2019	8	2	Black-naped Oriole	1
MGZUC03	Myeik	University Campus	3	3	2019	7	12	Black-naped Oriole	2
MGZUC05	Myeik	University Campus	3	3	2019	7	52	Black-naped Oriole	1
MDLUC01	Mandalay	University Campus	23	7	2019	6	39	Blue-tailed Bee-eater	3
MDLUC06	Mandalay	University Campus	23	7	2019	7	59	Blue-tailed Bee-eater	5
MGZUC04	Myeik	University Campus	3	3	2019	7	29	Brown Shrike	1
MGZUC05	Myeik	University Campus	3	3	2019	7	43	Brown Shrike	1
MAWUC06	Mawlamyine	University Campus	9	3	2019	7	43	Common Iora	1
MAWUC07	Mawlamyine	University Campus	9	3	2019	7	5	Common Iora	1
MAWUC08	Mawlamyine	University Campus	9	3	2019	8	2	Common Iora	2
MDLUC02	Mandalay	University Campus	23	7	2019	5	40	Common Iora	2
MDLUC03	Mandalay	University Campus	23	7	2019	7	28	Common Iora	1
MDLUC04	Mandalay	University Campus	23	7	2019	5	56	Common Iora	2
MDLUC05	Mandalay	University Campus	23	7	2019	7	11	Common Iora	2
MDLUC07	Mandalay	University Campus	23	7	2019	6	32	Common Iora	1
MDLUC10	Mandalay	University Campus	23	7	2019	6	57	Common Iora	1
MAWUC02	Mawlamyine	University Campus	9	3	2019	6	10	Common Myna	1
MAWUC03	Mawlamyine	University Campus	9	3	2019	6	30	Common Myna	1
MAWUC04	Mawlamyine	University Campus	9	3	2019	6	49	Common Myna	3
MAWUC05	Mawlamyine	University Campus	9	3	2019	7	24	Common Myna	2
MAWUC07	Mawlamyine	University Campus	9	3	2019	7	5	Common Myna	1
MAWUC08	Mawlamyine	University Campus	9	3	2019	8	2	Common Myna	2
MAWUC09	Mawlamyine	University Campus	9	3	2019	8	18	Common Myna	4
MAWUC10	Mawlamyine	University Campus	9	3	2019	8	39	Common Myna	1
MDLUC01	Mandalay	University Campus	23	7	2019	6	41	Common Myna	1
MDLUC05	Mandalay	University Campus	23	7	2019	7	14	Common Myna	5
MDLUC06	Mandalay	University Campus	23	7	2019	8	0	Common Myna	1
MDLUC10	Mandalay	University Campus	23	7	2019	6	58	Common Myna	2
MGZUC02	Myeik	University Campus	3	3	2019	6	35	Common Myna	5
MGZUC03	Myeik	University Campus	3	3	2019	7	12	Common Myna	12
MGZUC06	Myeik	University Campus	3	3	2019	8	19	Common Myna	2
MGZUC07	Myeik	University Campus	3	3	2019	8	0	Common Myna	5
MGZUC08	Myeik	University Campus	3	3	2019	5	53	Common Myna	3
MGZUC09	Myeik	University Campus	3	3	2019	8	45	Common Myna	6
MGZUC10	Myeik	University Campus	3	3	2019	6	51	Common Myna	4
MAWUC02	Mawlamyine	University Campus	9	3	2019	6	10	Common Tailorbird	1
MAWUC04	Mawlamyine	University Campus	9	3	2019	6	49	Common Tailorbird	1
MAWUC06	Mawlamyine	University Campus	9	3	2019	7	43	Common Tailorbird	1
MDLUC06	Mandalay	University Campus	23	7	2019	8	6	Common Tailorbird	1
MDLUC07	Mandalay	University Campus	23	7	2019	6	27	Common Tailorbird	1
MGZUC01	Myeik	University Campus	3	3	2019	6	13	Common Tailorbird	2
MGZUC03	Myeik	University Campus	3	3	2019	7	12	Common Tailorbird	2
MGZUC04	Myeik	University Campus	3	3	2019	7	29	Common Tailorbird	2
MGZUC07	Myeik	University Campus	3	3	2019	8	0	Common Tailorbird	1
MGZUC09	Myeik	University Campus	3	3	2019	8	36	Common Tailorbird	1
MAWUC02	Mawlamyine	University Campus	9	3	2019	6	10	Coppersmith Barbet	1
MAWUC03	Mawlamyine	University Campus	9	3	2019	6	30	Coppersmith Barbet	1
MAWUC06	Mawlamyine	University Campus	9	3	2019	7	43	Coppersmith Barbet	2
MAWUC07	Mawlamyine	University Campus	9	3	2019	7	5	Coppersmith Barbet	1
MAWUC10	Mawlamyine	University Campus	9	3	2019	8	39	Coppersmith Barbet	1
MDLUC01	Mandalay	University Campus	23	7	2019	6	40	Coppersmith Barbet	3
MDLUC02	Mandalay	University Campus	23	7	2019	5	42	Coppersmith Barbet	2
MDLUC03	Mandalay	University Campus	23	7	2019	7	28	Coppersmith Barbet	6
MDLUC04	Mandalay	University Campus	23	7	2019	5	50	Coppersmith Barbet	7
MDLUC05	Mandalay	University Campus	23	7	2019	7	13	Coppersmith Barbet	2
MDLUC06	Mandalay	University Campus	23	7	2019	8	1	Coppersmith Barbet	4
MDLUC07	Mandalay	University Campus	23	7	2019	6	31	Coppersmith Barbet	1
MDLUC08	Mandalay	University Campus	23	7	2019	7	42	Coppersmith Barbet	1
MGZUC05	Myeik	University Campus	3	3	2019	7	43	Dusky Warbler	5
MGZUC01	Myeik	University Campus	3	3	2019	6	13	Edible-nest Swiftlet	10
MGZUC02	Myeik	University Campus	3	3	2019	6	35	Edible-nest Swiftlet	24
MGZUC06	Myeik	University Campus	3	3	2019	8	19	Edible-nest Swiftlet	1
MGZUC08	Myeik	University Campus	3	3	2019	5	53	Edible-nest Swiftlet	20
MGZUC10	Myeik	University Campus	3	3	2019	6	51	Edible-nest Swiftlet	3
MAWUC03	Mawlamyine	University Campus	9	3	2019	6	30	Eurasian Tree Sparrow	15
MAWUC04	Mawlamyine	University Campus	9	3	2019	6	49	Eurasian Tree Sparrow	9
MAWUC07	Mawlamyine	University Campus	9	3	2019	7	5	Eurasian Tree Sparrow	8
MAWUC09	Mawlamyine	University Campus	9	3	2019	8	18	Eurasian Tree Sparrow	4
MAWUC10	Mawlamyine	University Campus	9	3	2019	8	39	Eurasian Tree Sparrow	10
MDLUC02	Mandalay	University Campus	23	7	2019	5	41	Glossy Ibis	5
MDLUC07	Mandalay	University Campus	23	7	2019	6	26	Glossy Ibis	1
MAWUC03	Mawlamyine	University Campus	9	3	2019	6	30	Greater Coucal	1
MAWUC05	Mawlamyine	University Campus	9	3	2019	7	24	Greater Coucal	2
MAWUC07	Mawlamyine	University Campus	9	3	2019	7	5	Greater Coucal	1
MAWUC09	Mawlamyine	University Campus	9	3	2019	8	18	Greater Coucal	1
MGZUC03	Myeik	University Campus	3	3	2019	7	12	Greater Coucal	1
MGZUC06	Myeik	University Campus	3	3	2019	8	19	Greater Coucal	1
MGZUC07	Myeik	University Campus	3	3	2019	8	0	Greater Coucal	2
MGZUC08	Myeik	University Campus	3	3	2019	5	53	Greater Coucal	1
MGZUC10	Myeik	University Campus	3	3	2019	6	51	Greater Coucal	1
MGZUC07	Myeik	University Campus	3	3	2019	8	0	Green-billed Malkoha	2
MDLUC02	Mandalay	University Campus	23	7	2019	5	43	Himalayan Swiftlet	6
MDLUC03	Mandalay	University Campus	23	7	2019	7	31	Himalayan Swiftlet	10
MDLUC04	Mandalay	University Campus	23	7	2019	5	52	Himalayan Swiftlet	1
MDLUC06	Mandalay	University Campus	23	7	2019	7	59	Himalayan Swiftlet	1
MDLUC07	Mandalay	University Campus	23	7	2019	6	26	Himalayan Swiftlet	3
MDLUC08	Mandalay	University Campus	23	7	2019	7	40	Himalayan Swiftlet	12
MAWUC01	Mawlamyine	University Campus	9	3	2019	5	53	House Crow	5
MAWUC02	Mawlamyine	University Campus	9	3	2019	6	10	House Crow	4
MAWUC05	Mawlamyine	University Campus	9	3	2019	7	24	House Crow	1
MAWUC07	Mawlamyine	University Campus	9	3	2019	7	5	House Crow	1
MAWUC08	Mawlamyine	University Campus	9	3	2019	8	2	House Crow	2
MAWUC10	Mawlamyine	University Campus	9	3	2019	8	39	House Crow	2
MDLUC01	Mandalay	University Campus	23	7	2019	6	38	House Crow	2
MDLUC04	Mandalay	University Campus	23	7	2019	5	50	House Crow	1
MDLUC07	Mandalay	University Campus	23	7	2019	6	29	House Crow	3
MDLUC09	Mandalay	University Campus	23	7	2019	6	7	House Crow	11
MGZUC02	Myeik	University Campus	3	3	2019	6	35	House Crow	4
MGZUC03	Myeik	University Campus	3	3	2019	7	12	House Crow	1
MGZUC06	Myeik	University Campus	3	3	2019	8	19	House Crow	3
MGZUC07	Myeik	University Campus	3	3	2019	8	0	House Crow	2
MGZUC08	Myeik	University Campus	3	3	2019	5	53	House Crow	1
MGZUC09	Myeik	University Campus	3	3	2019	8	36	House Crow	6
MGZUC10	Myeik	University Campus	3	3	2019	6	51	House Crow	4
MDLUC01	Mandalay	University Campus	23	7	2019	6	39	House Sparrow	4
MDLUC03	Mandalay	University Campus	23	7	2019	7	26	House Sparrow	13
MDLUC04	Mandalay	University Campus	23	7	2019	5	53	House Sparrow	8
MDLUC05	Mandalay	University Campus	23	7	2019	7	12	House Sparrow	6
MDLUC06	Mandalay	University Campus	23	7	2019	7	58	House Sparrow	5
MDLUC07	Mandalay	University Campus	23	7	2019	6	24	House Sparrow	20
MDLUC08	Mandalay	University Campus	23	7	2019	7	48	House Sparrow	2
MDLUC09	Mandalay	University Campus	23	7	2019	6	6	House Sparrow	18
MDLUC10	Mandalay	University Campus	23	7	2019	6	59	House Sparrow	9
MDLUC01	Mandalay	University Campus	23	7	2019	6	46	House Swift	1
MDLUC02	Mandalay	University Campus	23	7	2019	5	39	House Swift	1
MDLUC07	Mandalay	University Campus	23	7	2019	6	26	House Swift	2
MDLUC04	Mandalay	University Campus	23	7	2019	5	50	Jungle Myna	4
MDLUC07	Mandalay	University Campus	23	7	2019	6	31	Jungle Myna	1
MDLUC08	Mandalay	University Campus	23	7	2019	7	50	Jungle Myna	1
MDLUC10	Mandalay	University Campus	23	7	2019	7	4	Jungle Myna	1
MGZUC06	Myeik	University Campus	3	3	2019	8	19	Jungle Myna	10
MGZUC02	Myeik	University Campus	3	3	2019	6	44	Large-billed Crow	1
MGZUC03	Myeik	University Campus	3	3	2019	7	12	Large-billed Crow	2
MGZUC04	Myeik	University Campus	3	3	2019	7	29	Lineated Barbet	1
MGZUC08	Myeik	University Campus	3	3	2019	5	53	Lineated Barbet	1
MDLUC10	Mandalay	University Campus	23	7	2019	7	2	Little Cormorant	1
MAWUC04	Mawlamyine	University Campus	9	3	2019	6	49	Little Egret	2
MDLUC02	Mandalay	University Campus	23	7	2019	5	41	Little Egret	2
MDLUC04	Mandalay	University Campus	23	7	2019	6	0	Little Egret	1
MDLUC08	Mandalay	University Campus	23	7	2019	7	43	Little Egret	1
MGZUC01	Myeik	University Campus	3	3	2019	6	22	Little Egret	1
MGZUC08	Myeik	University Campus	3	3	2019	5	53	Little Egret	4
MAWUC05	Mawlamyine	University Campus	9	3	2019	7	24	Little Green Bee-eater	2
MAWUC06	Mawlamyine	University Campus	9	3	2019	7	43	Little Green Bee-eater	1
MDLUC03	Mandalay	University Campus	23	7	2019	7	27	Little Green Bee-eater	1
MDLUC06	Mandalay	University Campus	23	7	2019	8	0	Little Green Bee-eater	1
MAWUC01	Mawlamyine	University Campus	9	3	2019	5	53	Olive-backed Sunbird	2
MAWUC08	Mawlamyine	University Campus	9	3	2019	8	2	Olive-backed Sunbird	1
MGZUC03	Myeik	University Campus	3	3	2019	7	12	Olive-backed Sunbird	1
MGZUC10	Myeik	University Campus	3	3	2019	6	51	Olive-backed Sunbird	2
MAWUC01	Mawlamyine	University Campus	9	3	2019	5	53	Oriental Magpie Robin	1
MAWUC05	Mawlamyine	University Campus	9	3	2019	7	24	Oriental Magpie Robin	1
MAWUC09	Mawlamyine	University Campus	9	3	2019	8	18	Oriental Magpie Robin	1
MAWUC10	Mawlamyine	University Campus	9	3	2019	8	39	Oriental Magpie Robin	1
MDLUC01	Mandalay	University Campus	23	7	2019	6	39	Oriental Magpie Robin	2
MDLUC03	Mandalay	University Campus	23	7	2019	7	27	Oriental Magpie Robin	5
MDLUC06	Mandalay	University Campus	23	7	2019	8	7	Oriental Magpie Robin	1
MDLUC07	Mandalay	University Campus	23	7	2019	6	23	Oriental Magpie Robin	2
MDLUC10	Mandalay	University Campus	23	7	2019	7	2	Oriental Magpie Robin	1
MAWUC08	Mawlamyine	University Campus	9	3	2019	8	2	Oriole	1
MDLUC08	Mandalay	University Campus	23	7	2019	7	44	Pied Cuckoo	1
MAWUC02	Mawlamyine	University Campus	9	3	2019	6	10	Pond Heron	1
MAWUC10	Mawlamyine	University Campus	9	3	2019	8	39	Pond Heron	1
MGZUC01	Myeik	University Campus	3	3	2019	6	13	Pond Heron	1
MDLUC06	Mandalay	University Campus	23	7	2019	7	57	Purple Sunbird	3
MAWUC02	Mawlamyine	University Campus	9	3	2019	6	10	Red-vented Bulbul	1
MAWUC04	Mawlamyine	University Campus	9	3	2019	6	49	Red-vented Bulbul	2
MAWUC06	Mawlamyine	University Campus	9	3	2019	7	43	Red-vented Bulbul	3
MAWUC08	Mawlamyine	University Campus	9	3	2019	8	2	Red-vented Bulbul	1
MAWUC09	Mawlamyine	University Campus	9	3	2019	8	18	Red-vented Bulbul	1
MAWUC10	Mawlamyine	University Campus	9	3	2019	8	39	Red-vented Bulbul	4
MDLUC01	Mandalay	University Campus	23	7	2019	6	40	Red-vented Bulbul	4
MDLUC02	Mandalay	University Campus	23	7	2019	5	38	Red-vented Bulbul	2
MDLUC03	Mandalay	University Campus	23	7	2019	7	26	Red-vented Bulbul	1
MDLUC07	Mandalay	University Campus	23	7	2019	6	24	Red-vented Bulbul	2
MDLUC10	Mandalay	University Campus	23	7	2019	7	0	Red-vented Bulbul	2
MAWUC01	Mawlamyine	University Campus	9	3	2019	5	53	Red-whiskered Bulbul	3
MAWUC02	Mawlamyine	University Campus	9	3	2019	6	10	Red-whiskered Bulbul	1
MAWUC03	Mawlamyine	University Campus	9	3	2019	6	30	Red-whiskered Bulbul	2
MAWUC04	Mawlamyine	University Campus	9	3	2019	6	49	Red-whiskered Bulbul	1
MAWUC06	Mawlamyine	University Campus	9	3	2019	7	43	Red-whiskered Bulbul	1
MAWUC07	Mawlamyine	University Campus	9	3	2019	7	5	Red-whiskered Bulbul	10
MAWUC08	Mawlamyine	University Campus	9	3	2019	8	2	Red-whiskered Bulbul	2
MAWUC09	Mawlamyine	University Campus	9	3	2019	8	18	Red-whiskered Bulbul	3
MAWUC01	Mawlamyine	University Campus	9	3	2019	5	53	Rock Pigeon	4
MAWUC04	Mawlamyine	University Campus	9	3	2019	6	49	Rock Pigeon	20
MAWUC05	Mawlamyine	University Campus	9	3	2019	7	24	Rock Pigeon	1
MAWUC07	Mawlamyine	University Campus	9	3	2019	7	5	Rock Pigeon	3
MDLUC01	Mandalay	University Campus	23	7	2019	6	42	Rock Pigeon	1
MDLUC02	Mandalay	University Campus	23	7	2019	5	37	Rock Pigeon	2
MDLUC03	Mandalay	University Campus	23	7	2019	7	33	Rock Pigeon	1
MDLUC04	Mandalay	University Campus	23	7	2019	5	51	Rock Pigeon	1
MDLUC05	Mandalay	University Campus	23	7	2019	7	16	Rock Pigeon	1
MDLUC06	Mandalay	University Campus	23	7	2019	8	3	Rock Pigeon	6
MDLUC08	Mandalay	University Campus	23	7	2019	7	43	Rock Pigeon	3
MDLUC09	Mandalay	University Campus	23	7	2019	6	8	Rock Pigeon	5
MDLUC10	Mandalay	University Campus	23	7	2019	6	57	Rock Pigeon	11
MGZUC03	Myeik	University Campus	3	3	2019	7	21	Rock Pigeon	3
MGZUC05	Myeik	University Campus	3	3	2019	7	43	Rock Pigeon	3
MGZUC08	Myeik	University Campus	3	3	2019	6	3	Rock Pigeon	2
MGZUC09	Myeik	University Campus	3	3	2019	8	36	Rock Pigeon	5
MGZUC10	Myeik	University Campus	3	3	2019	6	51	Rock Pigeon	7
MDLUC01	Mandalay	University Campus	23	7	2019	6	41	Rose-ringed Parakeet	2
MDLUC05	Mandalay	University Campus	23	7	2019	7	20	Rose-ringed Parakeet	1
MGZUC05	Myeik	University Campus	3	3	2019	7	43	Scaly-breasted Munia	30
MGZUC10	Myeik	University Campus	3	3	2019	7	1	Scaly-breasted Munia	5
MAWUC09	Mawlamyine	University Campus	9	3	2019	8	18	Scarlet-backed Flowerpecker	1
MDLUC02	Mandalay	University Campus	23	7	2019	5	45	Scarlet-backed Flowerpecker	1
MGZUC01	Myeik	University Campus	3	3	2019	6	13	Scarlet-backed Flowerpecker	1
MGZUC04	Myeik	University Campus	3	3	2019	7	29	Scarlet-backed Flowerpecker	4
MGZUC10	Myeik	University Campus	3	3	2019	6	51	Scarlet-backed Flowerpecker	1
MAWUC03	Mawlamyine	University Campus	9	3	2019	6	30	Spotted Dove	1
MAWUC04	Mawlamyine	University Campus	9	3	2019	6	49	Spotted Dove	1
MAWUC06	Mawlamyine	University Campus	9	3	2019	7	43	Spotted Dove	2
MAWUC07	Mawlamyine	University Campus	9	3	2019	7	5	Spotted Dove	1
MAWUC09	Mawlamyine	University Campus	9	3	2019	8	18	Spotted Dove	1
MAWUC10	Mawlamyine	University Campus	9	3	2019	8	39	Spotted Dove	2
MDLUC01	Mandalay	University Campus	23	7	2019	6	41	Spotted Dove	2
MDLUC03	Mandalay	University Campus	23	7	2019	7	28	Spotted Dove	1
MDLUC04	Mandalay	University Campus	23	7	2019	5	55	Spotted Dove	4
MDLUC05	Mandalay	University Campus	23	7	2019	7	15	Spotted Dove	4
MDLUC06	Mandalay	University Campus	23	7	2019	8	1	Spotted Dove	2
MDLUC07	Mandalay	University Campus	23	7	2019	6	29	Spotted Dove	1
MDLUC08	Mandalay	University Campus	23	7	2019	7	42	Spotted Dove	1
MDLUC10	Mandalay	University Campus	23	7	2019	7	1	Spotted Dove	4
MGZUC05	Myeik	University Campus	3	3	2019	7	43	Spotted Dove	2
MGZUC09	Myeik	University Campus	3	3	2019	8	36	Spotted Dove	8
MGZUC10	Myeik	University Campus	3	3	2019	6	51	Spotted Dove	2
MGZUC01	Myeik	University Campus	3	3	2019	6	13	Stripe-throated Bulbul	1
MGZUC06	Myeik	University Campus	3	3	2019	8	28	Stripe-throated Bulbul	1
MGZUC07	Myeik	University Campus	3	3	2019	8	0	Stripe-throated Bulbul	4
MAWUC10	Mawlamyine	University Campus	9	3	2019	8	39	Swift	1
MAWUC02	Mawlamyine	University Campus	9	3	2019	6	10	Taiga Flycatcher	1
MDLUC01	Mandalay	University Campus	23	7	2019	6	43	Venous-breasted Myna	2
MDLUC02	Mandalay	University Campus	23	7	2019	5	38	Venous-breasted Myna	2
MDLUC03	Mandalay	University Campus	23	7	2019	7	28	Venous-breasted Myna	1
MDLUC05	Mandalay	University Campus	23	7	2019	7	14	Venous-breasted Myna	2
MDLUC06	Mandalay	University Campus	23	7	2019	8	1	Venous-breasted Myna	2
MDLUC07	Mandalay	University Campus	23	7	2019	6	22	Venous-breasted Myna	1
MDLUC08	Mandalay	University Campus	23	7	2019	7	49	Venous-breasted Myna	1
MDLUC10	Mandalay	University Campus	23	7	2019	7	1	Venous-breasted Myna	1
MAWUC02	Mawlamyine	University Campus	9	3	2019	6	10	Warbler sp.	1
MDLUC10	Mandalay	University Campus	23	7	2019	7	2	White-breasted Waterhen	1
MGZUC05	Myeik	University Campus	3	3	2019	7	43	White-rumped Munia	50
MDLUC03	Mandalay	University Campus	23	7	2019	7	29	White-throated Babbler	2
MDLUC04	Mandalay	University Campus	23	7	2019	5	52	White-throated Babbler	1
MDLUC05	Mandalay	University Campus	23	7	2019	7	15	White-throated Babbler	1
MDLUC07	Mandalay	University Campus	23	7	2019	6	25	White-throated Babbler	1
MDLUC08	Mandalay	University Campus	23	7	2019	7	49	White-throated Babbler	1
MDLUC09	Mandalay	University Campus	23	7	2019	6	7	White-throated Babbler	9
MDLUC10	Mandalay	University Campus	23	7	2019	7	0	White-throated Babbler	3
MAWUC03	Mawlamyine	University Campus	9	3	2019	6	30	White-throated Kingfisher	2
MAWUC09	Mawlamyine	University Campus	9	3	2019	8	18	White-throated Kingfisher	1
MDLUC01	Mandalay	University Campus	23	7	2019	6	43	White-throated Kingfisher	1
MDLUC07	Mandalay	University Campus	23	7	2019	6	24	White-throated Kingfisher	1
MDLUC09	Mandalay	University Campus	23	7	2019	6	13	White-throated Kingfisher	1
MGZUC04	Myeik	University Campus	3	3	2019	7	29	Yellow-vented Bulbul	1
MGZUC05	Myeik	University Campus	3	3	2019	7	43	Yellow-vented Bulbul	1
						5
						10
